# Supplementary material for: Municipality-Level Spatial Clustering and Socio- Environmental Determinants of Tuberculosis in Nepal, 2019- 2024
Source: Research Square preprint supplement (doi:10.21203/rs.3.rs-8515251/v1), 2026-01-27
Supplement: Supplementary file 1 [file 433fc495963a1c3eae9ab5f9.docx]

Table 2 Univariate Global Moran’s I analysis of tuberculosis (TB) notification rates (per 100,000 population) by province, fiscal years 2019/20–2023/24.

| Year | Morans’I Index | Z -value | P value |
| --- | --- | --- | --- |
| 2019/20 | 0.42 | 18.35 | ≤ 0.001 |
| 2020/21 | 0.46 | 20.4 | ≤ 0.001 |
| 2021/22 | 0.52 | 23.14 | ≤ 0.001 |
| 2022/23 | 0.53 | 23.3 | ≤ 0.001 |
| 2023/24 | 0.48 | 21.33 | ≤ 0.001 |
| Average annual | 0.48 | 21.3 | ≤ 0.001 |

**Note: The Global Moran's I index represents the spatial autocorrelation of TB Notification among municipalities*
