# Supplementary material for: Municipality-Level Spatial Clustering and Socio- Environmental Determinants of Tuberculosis in Nepal, 2019- 2024
Source: Research Square preprint supplement (doi:10.21203/rs.3.rs-8515251/v1), 2026-01-27
Supplement: Supplementary file 2 [file 8789d5ddbee7543dedbc92c9.docx]

| **Variable** | **2019/20**  **N (%)** | **2020/21**  **N (%)** | **2021/22**  **N (%)** | **2022/23**  **N (%)** | **2023/24**  **N (%)** |
| --- | --- | --- | --- | --- | --- |
| **Sex** | | | | | |
| Female | 10220 (37.1) | 10868 (38) | 14535 (38.5) | 14131 (37.7) | 15797 (38.7) |
| Male | 17322 (62.9) | 17734 (62) | 23253 (61.5) | 23316 (62.3) | 24979 (61.3) |
| **Age in Years** | | | | | |
| 0-4 | 651(2.43) | 929 (3.2) | 1953 (5.1) | 1619 (4.3) | 2007 (4.9) |
| 5-14 | 966 (3.62) | 975 (3.4) | 1350 (3.5) | 1388 (3.7) | 1561 (3.8) |
| 15-24 | 4939 (18.5) | 5183 (18.1) | 6342 (16.7) | 5923 (15.8) | 6200 (15.1) |
| 25-34 | 4504 (16.8) | 4800 (16.7) | 5913 (15.6) | 5497 (14.6) | 5707 (13.9) |
| 35-44 | 3637 (13.6) | 3821 (13.3) | 4774 (12.5) | 4836 (12.9) | 4812 (11.7) |
| 45-54 | 3690 (13.8) | 3898 (13.6) | 5043 (13.3) | 4844 (12.9) | 5316 (13) |
| 55-64 | 3709 (13.8) | 3961 (13.8) | 5139 (13.5) | 5331 (14.2) | 5907 (14.4) |
| ≥65 | 4589 (17.1) | 5032 (17.5) | 7376 (19.4) | 8009 (21.3) | 9310 (22.8) |
| **TB type** | | | | | |
| PBC | 15153 (55) | 16262 (56.9) | 21595 (57.3) | 21458 (57.3) | 23426 (57.5) |
| PCD | 3784 (13.7) | 3892 (13.6) | 5653 (15) | 5690 (15.2) | 6237 (15.3) |
| EP | 8605 (31.2) | 8448 (29.5) | 10540 (27.9) | 10299 (27.5) | 11113 (27.3) |
| **TB category** | | | | | |
| New | 25116 (94.1) | 26521 (92.7) | 35141 (92.7) | 34324 (91.7) | 37136 (90.9) |
| Relapse | 1568 (5.8) | 1628 (5.6) | 2156 (5.6) | 2505 (6.7) | 3034 (7.4) |
| Others | 1 (0.0) | 450 (1.8) | 593 (1.5) | 618 (1.7) | 650 (1.5) |
| **Total** | **27,542** | **28,602** | **37,788** | **37,447** | **40,776** |

**Table 1 Characteristics of notified tuberculosis cases in Nepal, FY 2019/20–2023/24**
