# Supplementary material for: Municipality-Level Spatial Clustering and Socio- Environmental Determinants of Tuberculosis in Nepal, 2019- 2024
Source: Research Square preprint supplement (doi:10.21203/rs.3.rs-8515251/v1), 2026-01-27
Supplement: Supplementary file 3 [file 890f9753c36ca860bca35948.docx]

**Table 5 Multivariable spatial regression results (OLS, SLM, and SEM) for tuberculosis notification rates across municipalities in Nepal**

| **Variables** | **OLS β coefficients** | **SLM β β-coefficients** | **SEM β coefficients** |
| --- | --- | --- | --- |
| Population Density | 0.003 | 0.001 | 0.005** |
| Literacy Rate | -0.647** | -0.162 | -0.305 |
| Household size | 3.907 | -0.531 | 1.592 |
| LPG (cooking) | 71.131*** | 44.647*** | 60.849*** |
| Biogas (cooking) | 76.444 | -15.555 | -45.040 |
| Dung (cooking) | -85.568*** | -32.269* | -48.426* |
| Mud floor (housing) | 20.612 | 14.649 | 22.121 |
| Mud wall (housing) | -36.430*** | -21.592* | -38.397*** |
| Average Humidity (5yr) | -5101.432* | -4542.234** | -678.527 |
| Average LSTN (5yr) | 3.510*** | 1.923*** | 1.690* |
| Average Precipitation (5yr) | -0.007 | -0.004 | -0.003 |
| **Spatial Parameter** | - | ρ = 0.637*** | λ = 0.684*** |
| **Model Fit Statistics** |  |  |  |
| R² / Pseudo-R² | 0.392 | 0.618 | 0.628 |
| AIC | 7629.93 | 7355.08 | 7347.68 |
| BIC | 7685.42 | 7415.19 | 7403.17 |
| Log-Likelihood | -3802.97 | -3664.54 | -3661.84 |
| Sigma-square | 1449.58 | 896.605 | 873.921 |
| **Diagnostic Tests** |  |  |  |
| Moran's I (residuals) | 0.435*** | - | - |
| LM-Lag | 364.19*** | - | - |
| LM-Error | 367.32*** | - | - |
| Robust LM-Lag | 12.20*** | - | - |
| Robust LM-Error | 15.33*** | - | - |
| Likelihood Ratio Test | - | 276.85*** | 282.25*** |
| Breusch-Pagan (heteroskedasticity) | 75.53*** | 24.41* | 30.91** |

*Reported values are unstandardized regression coefficients. OLS = Ordinary Least Square SAR = spatial lag model (ρ); SEM = spatial error model (λ). AIC = Akaike Information Criterion. Lower AIC values indicate better model fit. R² reported for OLS and pseudo-R² (Log-likelihood based, GeoDa method) for SAR and SEM. Significance levels: ***p < .001, **p < .01, *p < .05*
