# Supplementary material for: Municipality-Level Spatial Clustering and Socio- Environmental Determinants of Tuberculosis in Nepal, 2019- 2024
Source: Research Square preprint supplement (doi:10.21203/rs.3.rs-8515251/v1), 2026-01-27
Supplement: Supplementary file 4 [file b2310fe2576259061dd0dc82.docx]

| Variables | Moran’s I (Bivariate LISA ) | | | | | Average annual |
| --- | --- | --- | --- | --- | --- | --- |
| 2019/20 | 2020/21 | 2021/22 | 2022/23 | 2023/24 |
| Population Density | 0.176 | 0.194 | 0.202 | 0.216 | 0.179 | 0.1934 |
| Literacy Rate | 0.031 | -0.078 | -0.081 | -0.105 | -0.107 | -0.068 |
| Household size | 0.132 | 0.176 | 0.213 | 0.234 | 0.237 | 0.1984 |
| Cooking on Firewood | -0.274 | -0.292 | -0.288 | -0.298 | -0.278 | -0.286 |
| Cooking on LPG | 0.286 | 0.27 | 0.269 | 0.28 | 0.252 | 0.2714 |
| Cooking on Biogas | 0.115 | 0.142 | 0.145 | 0.106 | 0.111 | 0.1238 |
| Cooking on dung | -0.029 | 0.05 | 0.041 | 0.052 | 0.067 | 0.0362 |
| Mud floor Housing | -0.24 | -0.223 | -0.21 | -0.213 | -0.191 | -0.2154 |
| Mud wall | 0.267 | 0.253 | 0.231 | 0.244 | 0.216 | 0.2422 |
| Cement floor | -0.341 | -0.383 | -0.383 | -0.4 | -0.371 | -0.3756 |
| Cement Wall | 0.33 | 0.242 | 0.338 | 0.352 | 0.331 | 0.3186 |
| Humidity | 0.327 | 0.317 | 0.312 | 0.344 | 0.314 | 0.3228 |
| Precipitation | 0.345 | 0.347 | 0.378 | 0.377 | 0.372 | 0.3638 |
| LSTN | 0.346 | 0.398 | 0.396 | 0.422 | 0.412 | 0.3948 |
| LSTD | 0.234 | 0.226 | 0.025 | 0.121 | 0.013 | 0.1238 |

Table 4 Bivariate Moran’s I (LISA) values for spatial association between TB notification rates and selected determinants in Nepal, 2019/20–2023/24
