# Supplementary material for: Municipality-Level Spatial Clustering and Socio- Environmental Determinants of Tuberculosis in Nepal, 2019- 2024
Source: Research Square preprint supplement (doi:10.21203/rs.3.rs-8515251/v1), 2026-01-27
Supplement: Supplementary file 5 [file f0a51e5962f9fe5248520452.docx]

Table 3 Univariate Getis-Ord Gi* analysis of tuberculosis notification rates (per 100,000 population), FY 2019/20-2023/24.

| Province | Number of Municipalities (Hotspots / Coldspots) | | | | |
| --- | --- | --- | --- | --- | --- |
| 2019/20 | 2020/21 | 2021/22 | 2022/23 | 2023/24 |
| Bagmati | 18/12 | 15/15 | 21/15 | 24/11 | 12/15 |
| Gandaki | 7/18 | 7/24 | 2/22 | 2/20 | 8/24 |
| Karnali | 2/19 | 4/24 | 3/25 | 2/26 | 2/28 |
| Koshi | 3/59 | 1/68 | 0/80 | 0/76 | 0/78 |
| Lumbini | 41/1 | 43/1 | 42/0 | 40/0 | 38/0 |
| Madhesh | 24/2 | 46/0 | 52/0 | 55/0 | 57/1 |
| Sudurpashchim | 9/10 | 8/4 | 8/12 | 6/12 | 7/7 |
| Total (N=753) | 104/121 | 124/136 | 128/154 | 129/148 | 124/153 |

*Note: Based on Getis-Ord Gi* statistics, p<0.05. Hotspots=high-high clusters (municipalities*

*with high TB rates surrounded by high-rate neighbors); Coldspots=low-low clusters*
